# Supplementary material
Source: PubMed Central journal article supplement (PMC3169131)
Supplement: 1019070108_st01.pdf [file 1019070108_st01.pdf]

**Supplemental Table 1 : Sequence of primers used for Quantitative PCR**

---

| <b>Gene Name</b>  | <b>Forward primer</b>        | <b>Reverse primer</b>     |
|-------------------|------------------------------|---------------------------|
| <b>18S</b>        | GAGGATGAGGTGGAACGTGT         | TCTTCAGTCGCTCCAGGTCT      |
| <b>NANOG</b>      | CAAAGGCAAACAACCCACTT         | TCTGCTGGAGGCTGAGGTAT      |
| <b>OCT4</b>       | CTTGCTGCAGAAGTGGGTGGAGGAA    | CTGCAGTGTGGGTTTCGGGCA     |
| <b>SOX2</b>       | TCGGCATCGCGTTTTT             | ACAGCAAATGACAGCTGCAAA     |
| <b>LEFTA</b>      | GGGAATTGGGATACCTGGATTC       | TAAATATGCACGGGCAAGGCTC    |
| <b>DNMT3B</b>     | ATAAGTCGAAGGTGCGTCGT         | GGCAACATCTGAAGCCATTT      |
| <b>CRIPTO</b>     | ACAGAACCTGCTGCCTGAAT         | ATCACAGCCGGGTAGAAATG      |
| <b>SOX17</b>      | GGCGCAGCAGAATCCAGA           | CCACGACTTGCCCAGCAT        |
| <b>AFP</b>        | ACTGCAATTGAGAAACCCACTGGAGATG | CGATGCTGGAGTGGGCTTTTTGTGT |
| <b>T</b>          | ATCACCAGCCACTGCTTC           | GGGTTCCCTCCATCATCTCTT     |
| <b>GATA6</b>      | CGGCCCTCATCAAGC              | TGACAGTTGGCACAGGACAA      |
| <b>NEUROD1</b>    | TCACATCATGAGCGAGTCATGA       | TGAAACTGGCGTGCCTCTAA      |
| <b>SOX10</b>      | AGCCCAGGTGAAGACAGAGA         | ATAGGGTCTGAGGGCTG AT      |
| <b>PAX3</b>       | CTGGAACATTTGCCAGACT          | GCTGTGCGTTCCTAGTCCAG      |
| <b>PAX6</b>       | GCCAGCAACACACCTAGTCA         | TGTGAGGGCTGTGTCTGTTC      |
| <b>KRT14</b>      | GGCCTGCTGAGATCAAAGACTAC      | CACTGTGGCTGTGAGAATCTTGTT  |
| <b>MITF Total</b> | CCGGGTGCAGAATTGTAAC          | GGACAATTTTGGCATTGTTGG     |
| <b>MITF-M</b>     | GCTCACAGCGTGTATTTTTCC        | TCTCTTTGGCCAGTGCTCTT      |
| <b>MITF-D</b>     | TTCCGCTCCATCTCTGAAGT         | TAGCTCGTGGGAAAACCACT      |
| <b>TRP1</b>       | AGCAGTAGTTGGCGCTTTGT         | TCAGTGAGGAGAGGCTGGTT      |
| <b>TYROSINASE</b> | TTGTACTGCCTGCTGTGGAG         | CAGGAACCTCTGCCTGAAAG      |
| <b>PMEL17</b>     | TGGACAGAAGCCCAGAGACT         | GCAATACCTTTTGGCTTCCA      |
| <b>OTX2</b>       | AGCTCGGGAAGTGAGTTCAG         | AGGAGGTGGACAAGGGATCT      |
| <b>BEST</b>       | GTCAGAGGCTCCTCCTTCT          | TCTGCTCCACCAGTGTCTG       |
| <b>RPE65</b>      | GATGCTTACGTACGGGCAAT         | AAAGCACAGGTGCCAAATTC      |
| <b>CMYC Trans</b> | TGCCTCAAATTGGACTTTGG         | CGCTCGAGGTTAACGAATT       |
| <b>KLF4 Trans</b> | GATGAACTGACCAGGCACTA         | CCTTGAGGTACCAGAGATCT      |
| <b>OCT4 Trans</b> | CCTCACTTCACTGCACTGTA         | CCTTGAGGTACCAGAGATCT      |
| <b>SOX2 Trans</b> | CCCAGCAGACTTCACATGT          | CCTTGAGGTACCAGAGATCT      |

---
