# Supplementary material
Source: PubMed Central journal article supplement (PMC3169131)
Supplement: 1019070108_st02.pdf [file 1019070108_st02.pdf]

Sup Table 2 Nissan et al.

List of CT, relative quantification (RQ values) and statistical calculation for Mel-hESC, Mel-iPSC and HEM. p- value>0.01 is considered as non significant.

|                            | HEM |    |    | Mel-hESC H9 |    |    | Mel-hESC SA01 |    |    | Mel-iPSC |    |    | RQ mel-hESC H9 | p-value mel-hESC H9 | RQ mel-hESC SA01 | p-value mel-hESC SA01 | RQ mel-iPSC | p-value mel-iPSC |
|----------------------------|-----|----|----|-------------|----|----|---------------|----|----|----------|----|----|----------------|---------------------|------------------|-----------------------|-------------|------------------|
| ADCY2-Hs00392747_m1        | 24  | 25 | 24 | 24          | 24 | 23 | 24            | 24 | 24 | 25       | 25 | 25 | 2              | 0                   | 3                | 0                     | 2           | 0                |
| AIM1-Hs00413464_m1         | 30  | 31 | 29 | 34          | 40 | 40 | 33            | 33 | 40 | 40       | 34 | 34 | 2              | 0                   | 1                | 1                     | 34          | 0                |
| AP1B1-Hs00153906_m1        | 23  | 24 | 23 | 23          | 23 | 23 | 23            | 23 | 23 | 23       | 24 | 24 | 2              | 0                   | 1                | 0                     | 1           | 0                |
| AP1M1-Hs00261227_m1        | 22  | 23 | 23 | 22          | 22 | 22 | 22            | 22 | 22 | 23       | 22 | 22 | 2              | 0                   | 1                | 0                     | 1           | 0                |
| AP1S1-Hs00611076_m1        | 22  | 22 | 22 | 21          | 22 | 22 | 21            | 21 | 21 | 22       | 22 | 22 | 2              | 0                   | 2                | 0                     | 1           | 1                |
| AP3B1-Hs00186383_m1        | 23  | 24 | 24 | 23          | 24 | 23 | 23            | 23 | 23 | 23       | 23 | 24 | 1              | 0                   | 1                | 1                     | 1           | 1                |
| AP3D1-Hs00187577_m1        | 22  | 22 | 23 | 22          | 22 | 22 | 22            | 22 | 22 | 23       | 23 | 22 | 1              | 0                   | 1                | 0                     | 1           | 0                |
| APAF1-Hs00559441_m1        | 24  | 25 | 25 | 25          | 26 | 25 | 24            | 25 | 25 | 25       | 25 | 25 | 2              | 0                   | 1                | 1                     | 2           | 0                |
| ASIP-Hs00181770_m1         | 34  | 34 | 40 | 34          | 34 | 40 | 40            | 40 | 40 | 34       | 40 | 40 | 0              | 0                   | 2                | 1                     | 2           | 0                |
| ATP2A2-Hs01566028_g1       | 21  | 21 | 21 | 21          | 21 | 21 | 20            | 21 | 21 | 22       | 22 | 22 | 2              | 0                   | 2                | 0                     | 2           | 0                |
| ATP7A-Hs00921963_m1        | 25  | 25 | 25 | 24          | 24 | 24 | 24            | 24 | 24 | 24       | 25 | 25 | 1              | 0                   | 1                | 0                     | 1           | 0                |
| B2M-Hs00187842_m1          | 19  | 19 | 19 | 19          | 19 | 19 | 20            | 20 | 20 | 19       | 19 | 19 | 1              | 0                   | 1                | 1                     | 1           | 1                |
| BAD-Hs00188930_m1          | 27  | 26 | 26 | 27          | 28 | 27 | 26            | 27 | 27 | 28       | 27 | 28 | 2              | 0                   | 1                | 0                     | 3           | 0                |
| BAX-Hs00180269_m1          | 22  | 22 | 22 | 21          | 22 | 21 | 21            | 21 | 21 | 22       | 22 | 22 | 1              | 0                   | 1                | 0                     | 1           | 0                |
| BCL2-Hs00236808_s1         | 25  | 24 | 24 | 25          | 25 | 25 | 25            | 25 | 25 | 25       | 25 | 24 | 1              | 0                   | 1                | 0                     | 1           | 0                |
| BID-Hs00609632_m1          | 25  | 26 | 26 | 25          | 25 | 26 | 25            | 25 | 26 | 26       | 26 | 27 | 2              | 0                   | 2                | 0                     | 2           | 0                |
| BLOC1S1-RDH5-Hs00155241_m1 | 23  | 23 | 24 | 22          | 23 | 23 | 22            | 23 | 23 | 24       | 23 | 24 | 2              | 0                   | 2                | 0                     | 1           | 0                |
| CALML6-Hs00758338_g1       | 30  | 28 | 32 | 33          | 31 | 34 | 31            | 28 | 31 | 29       | 30 | 32 | 2              | 1                   | 0                | 0                     | 2           | 0                |
| CAMK2A-Hs00392405_m1       | 30  | 28 | 29 | 30          | 30 | 31 | 30            | 29 | 29 | 31       | 31 | 32 | 3              | 0                   | 2                | 0                     | 4           | 0                |
| CASP3-Hs00234387_m1        | 24  | 24 | 24 | 24          | 24 | 24 | 24            | 24 | 24 | 24       | 24 | 24 | 1              | 0                   | 1                | 0                     | 1           | 0                |
| CASP8-Hs01018151_m1        | 27  | 26 | 26 | 26          | 26 | 26 | 26            | 26 | 26 | 26       | 26 | 26 | 2              | 0                   | 1                | 0                     | 1           | 0                |
| CDC42-Hs03044122_g1        | 20  | 20 | 20 | 20          | 21 | 20 | 20            | 20 | 20 | 20       | 20 | 20 | 1              | 0                   | 1                | 1                     | 1           | 0                |

|                       |    |    |    |    |    |    |    |    |    |    |    |    |    |   |   |   |     |   |
|-----------------------|----|----|----|----|----|----|----|----|----|----|----|----|----|---|---|---|-----|---|
| CDH1-Hs01023894_m1    | 22 | 22 | 21 | 25 | 24 | 25 | 28 | 28 | 28 | 21 | 21 | 21 | 0  | 0 | 0 | 0 | 1   | 0 |
| CREB1-Hs00231713_m1   | 24 | 24 | 24 | 24 | 24 | 24 | 23 | 23 | 24 | 24 | 23 | 24 | 1  | 1 | 1 | 0 | 1   | 0 |
| CREBBP-Hs00231733_m1  | 24 | 24 | 24 | 24 | 24 | 24 | 24 | 24 | 24 | 24 | 24 | 24 | 1  | 1 | 1 | 0 | 1   | 0 |
| CTNNB1-Hs00355045_m1  | 18 | 18 | 18 | 18 | 18 | 17 | 18 | 18 | 18 | 18 | 18 | 18 | 1  | 0 | 1 | 0 | 1   | 1 |
| DCT-Hs01098278_m1     | 19 | 19 | 19 | 21 | 21 | 21 | 22 | 22 | 22 | 19 | 19 | 19 | 0  | 0 | 0 | 0 | 1   | 0 |
| DCTN1-Hs00896389_g1   | 22 | 22 | 22 | 21 | 21 | 21 | 21 | 21 | 21 | 21 | 21 | 21 | 1  | 1 | 1 | 1 | 1   | 0 |
| DTNBP1-Hs01105864_m1  | 23 | 24 | 24 | 23 | 23 | 24 | 24 | 24 | 24 | 23 | 24 | 23 | 1  | 0 | 1 | 1 | 1   | 1 |
| DVL1-Hs00737028_m1    | 24 | 24 | 24 | 24 | 24 | 25 | 25 | 25 | 25 | 24 | 24 | 24 | 1  | 0 | 1 | 1 | 2   | 0 |
| EDN1-Hs01115919_m1    | 30 | 30 | 31 | 40 | 40 | 35 | 34 | 40 | 40 | 34 | 33 | 36 | 0  | 0 | 0 | 0 | 12  | 0 |
| EDNRB-Hs00240747_m1   | 19 | 19 | 20 | 20 | 21 | 20 | 21 | 21 | 21 | 20 | 20 | 20 | 0  | 0 | 1 | 0 | 1   | 0 |
| F2RL1-Hs00173741_m1   | 29 | 31 | 30 | 34 | 33 | 33 | 32 | 30 | 32 | 40 | 40 | 34 | 31 | 0 | 6 | 0 | 101 | 0 |
| FGFR2-Hs01552926_m1   | 34 | 36 | 38 | 34 | 33 | 40 | 31 | 32 | 40 | 33 | 33 | 40 | 2  | 0 | 1 | 1 | 0   | 0 |
| FZD10-Hs00273077_s1   | 32 | 32 | 34 | 35 | 40 | 34 | 33 | 33 | 33 | 33 | 32 | 32 | 1  | 0 | 0 | 0 | 1   | 1 |
| GADD45A-Hs00169255_m1 | 25 | 26 | 26 | 26 | 27 | 27 | 26 | 26 | 26 | 26 | 26 | 26 | 1  | 1 | 1 | 0 | 2   | 0 |
| GNAI1-Hs01053355_m1   | 22 | 23 | 24 | 24 | 24 | 24 | 23 | 23 | 23 | 23 | 23 | 24 | 2  | 0 | 1 | 1 | 2   | 0 |
| GNAO1-Hs00221365_m1   | 30 | 31 | 30 | 32 | 33 | 33 | 31 | 30 | 30 | 31 | 31 | 31 | 1  | 0 | 0 | 0 | 2   | 0 |
| GNAS-Hs00255603_m1    | 19 | 19 | 19 | 19 | 19 | 19 | 19 | 19 | 19 | 19 | 19 | 18 | 1  | 0 | 1 | 0 | 1   | 1 |
| GSK3B-Hs00275656_m1   | 23 | 23 | 23 | 23 | 23 | 23 | 23 | 23 | 23 | 23 | 23 | 23 | 1  | 0 | 1 | 0 | 1   | 0 |
| HPS1-Hs00164907_m1    | 23 | 23 | 23 | 23 | 23 | 23 | 23 | 23 | 23 | 23 | 22 | 23 | 1  | 0 | 1 | 0 | 1   | 0 |
| HPS3-Hs00289968_m1    | 24 | 24 | 24 | 23 | 24 | 23 | 23 | 23 | 23 | 23 | 23 | 23 | 1  | 0 | 1 | 0 | 1   | 0 |
| HPS4-Hs00222984_m1    | 22 | 22 | 23 | 22 | 22 | 22 | 22 | 22 | 22 | 22 | 22 | 22 | 1  | 0 | 1 | 0 | 1   | 0 |
| HRAS-Hs00610483_m1    | 25 | 25 | 25 | 24 | 25 | 24 | 24 | 24 | 24 | 26 | 26 | 25 | 3  | 0 | 2 | 0 | 2   | 0 |
| IL1A-Hs00174092_m1    | 35 | 35 | 33 | 40 | 40 | 40 | 33 | 40 | 34 | 40 | 40 | 40 | 50 | 0 | 1 | 1 | 56  | 0 |
| IL1B-Hs01555409_g1    | 28 | 29 | 29 | 34 | 38 | 40 | 31 | 31 | 30 | 37 | 33 | 40 | 16 | 0 | 0 | 1 | 66  | 0 |
| IL6-Hs00985638_g1     | 30 | 30 | 29 | 31 | 40 | 34 | 30 | 32 | 34 | 32 | 34 | 35 | 3  | 0 | 1 | 1 | 14  | 0 |
| KIT-Hs00174029_m1     | 22 | 22 | 22 | 22 | 22 | 23 | 23 | 24 | 24 | 21 | 21 | 21 | 0  | 0 | 1 | 0 | 1   | 0 |
| KITLG-Hs00295067_s1   | 27 | 28 | 29 | 27 | 27 | 27 | 26 | 26 | 27 | 28 | 28 | 28 | 3  | 0 | 3 | 0 | 1   | 1 |

|                      |    |    |    |    |    |    |    |    |    |    |    |    |    |   |    |   |     |   |
|----------------------|----|----|----|----|----|----|----|----|----|----|----|----|----|---|----|---|-----|---|
| KTN1-Hs00192160_m1   | 22 | 22 | 22 | 22 | 22 | 22 | 21 | 22 | 22 | 22 | 21 | 22 | 1  | 1 | 1  | 0 | 1   | 0 |
| LEF1-Hs00212390_m1   | 25 | 25 | 25 | 25 | 24 | 25 | 25 | 24 | 25 | 24 | 24 | 24 | 1  | 0 | 1  | 0 | 1   | 0 |
| MAP2K1-Hs00983247_g1 | 25 | 23 | 24 | 24 | 24 | 24 | 24 | 23 | 24 | 25 | 25 | 25 | 2  | 0 | 1  | 0 | 2   | 0 |
| MAPK1-Hs01046830_m1  | 22 | 22 | 22 | 22 | 22 | 22 | 21 | 22 | 22 | 22 | 22 | 22 | 1  | 0 | 1  | 0 | 1   | 0 |
| MAPK14-Hs00176247_m1 | 24 | 24 | 24 | 23 | 24 | 23 | 23 | 23 | 24 | 24 | 24 | 24 | 1  | 0 | 1  | 0 | 1   | 0 |
| MC1R-Hs00267168_s1   | 25 | 25 | 25 | 25 | 25 | 25 | 24 | 24 | 24 | 24 | 24 | 24 | 1  | 0 | 1  | 0 | 0   | 0 |
| MITF-Hs01117294_m1   | 20 | 20 | 20 | 20 | 20 | 20 | 20 | 20 | 20 | 20 | 20 | 20 | 1  | 0 | 1  | 1 | 1   | 1 |
| MLANA-Hs00194133_m1  | 19 | 19 | 19 | 19 | 19 | 19 | 19 | 19 | 19 | 19 | 19 | 19 | 1  | 0 | 1  | 0 | 1   | 1 |
| MLPH-Hs00225445_m1   | 20 | 20 | 20 | 20 | 20 | 20 | 20 | 20 | 20 | 20 | 20 | 20 | 1  | 0 | 1  | 0 | 1   | 1 |
| MYO5A-Hs00165309_m1  | 22 | 22 | 22 | 22 | 22 | 22 | 22 | 22 | 22 | 21 | 21 | 21 | 1  | 0 | 1  | 0 | 1   | 0 |
| OCA2-Hs01562046_m1   | 21 | 21 | 21 | 21 | 22 | 22 | 20 | 20 | 20 | 20 | 20 | 20 | 1  | 1 | 0  | 0 | 1   | 0 |
| PAX3-Hs00240950_m1   | 23 | 23 | 23 | 23 | 24 | 24 | 23 | 24 | 24 | 23 | 23 | 24 | 1  | 0 | 1  | 0 | 1   | 0 |
| PCNA-Hs99999177_g1   | 22 | 23 | 22 | 21 | 21 | 21 | 20 | 20 | 20 | 22 | 22 | 22 | 4  | 0 | 2  | 0 | 1   | 1 |
| PLCB1-Hs00248563_m1  | 25 | 26 | 26 | 28 | 28 | 28 | 31 | 31 | 30 | 33 | 32 | 34 | 5  | 0 | 26 | 0 | 172 | 0 |
| PMEL-Hs00173854_m1   | 17 | 17 | 17 | 17 | 17 | 18 | 17 | 17 | 18 | 17 | 17 | 17 | 1  | 0 | 1  | 0 | 1   | 1 |
| POLR2A-Hs00172187_m1 | 23 | 24 | 23 | 24 | 23 | 24 | 22 | 23 | 23 | 24 | 24 | 25 | 3  | 0 | 1  | 0 | 2   | 0 |
| POMC-Hs01596743_m1   | 33 | 40 | 40 | 40 | 40 | 40 | 35 | 35 | 40 | 40 | 40 | 40 | 24 | 0 | 1  | 1 | 38  | 0 |
| PPIA-Hs03045347_gH   | 19 | 19 | 19 | 19 | 19 | 19 | 19 | 19 | 19 | 19 | 19 | 19 | 1  | 0 | 1  | 0 | 1   | 0 |
| PRKACA-Hs00427274_m1 | 23 | 23 | 23 | 22 | 22 | 22 | 22 | 22 | 22 | 23 | 22 | 23 | 1  | 0 | 1  | 0 | 1   | 0 |
| PRKCA-Hs00176973_m1  | 24 | 24 | 24 | 25 | 25 | 25 | 24 | 24 | 24 | 24 | 24 | 25 | 1  | 0 | 1  | 0 | 2   | 0 |
| PRKCB-Hs00176998_m1  | 23 | 23 | 23 | 22 | 22 | 22 | 22 | 22 | 22 | 24 | 23 | 24 | 2  | 0 | 2  | 0 | 2   | 0 |
| PTGER1-Hs00168752_m1 | 34 | 34 | 32 | 32 | 33 | 33 | 32 | 32 | 33 | 34 | 33 | 37 | 3  | 0 | 2  | 0 | 2   | 0 |
| PTGER3-Hs00168755_m1 | 32 | 31 | 35 | 40 | 36 | 40 | 30 | 33 | 33 | 34 | 33 | 35 | 6  | 0 | 0  | 0 | 3   | 0 |
| RAB27A-Hs00608302_m1 | 22 | 22 | 22 | 21 | 21 | 21 | 21 | 21 | 21 | 22 | 22 | 22 | 1  | 0 | 1  | 0 | 1   | 1 |
| RAB32-Hs00199149_m1  | 20 | 20 | 20 | 20 | 20 | 20 | 20 | 20 | 20 | 20 | 20 | 19 | 1  | 0 | 1  | 0 | 1   | 0 |
| RAB38-Hs00223473_m1  | 20 | 20 | 20 | 19 | 20 | 20 | 20 | 20 | 20 | 20 | 20 | 20 | 2  | 0 | 2  | 0 | 1   | 0 |
| RAB3A-Hs00374262_m1  | 25 | 26 | 26 | 25 | 25 | 25 | 25 | 25 | 25 | 26 | 25 | 26 | 2  | 0 | 1  | 0 | 1   | 0 |

|                       |    |    |    |    |    |    |    |    |    |    |    |    |    |     |   |     |   |     |   |
|-----------------------|----|----|----|----|----|----|----|----|----|----|----|----|----|-----|---|-----|---|-----|---|
| RAC1-Hs01902432_s1    | 22 | 22 | 22 | 22 | 22 | 22 | 22 | 22 | 22 | 22 | 22 | 22 | 22 | 1   | 1 | 1   | 0 | 1   | 0 |
| RAF1-Hs00234119_m1    | 25 | 25 | 26 | 25 | 26 | 25 | 25 | 25 | 26 | 26 | 26 | 25 | 1  | 0   | 1 | 0   | 1 | 0   |   |
| RHOA-Hs00357608_m1    | 20 | 20 | 20 | 20 | 20 | 20 | 20 | 20 | 20 | 20 | 20 | 20 | 1  | 0   | 1 | 0   | 1 | 0   |   |
| RPLP0-Hs99999902_m1   | 19 | 19 | 19 | 19 | 19 | 19 | 19 | 19 | 19 | 19 | 19 | 19 | 1  | NaN | 1 | NaN | 1 | NaN |   |
| SLC24A5-Hs01385407_g1 | 20 | 20 | 20 | 20 | 20 | 20 | 20 | 20 | 20 | 20 | 20 | 20 | 1  | 1   | 1 | 1   | 1 | 0   |   |
| SNAP23-Hs00187075_m1  | 23 | 23 | 23 | 23 | 23 | 23 | 23 | 22 | 23 | 23 | 23 | 23 | 1  | 0   | 1 | 0   | 1 | 0   |   |
| SNAP25-Hs00268296_m1  | 31 | 30 | 31 | 28 | 29 | 28 | 28 | 29 | 29 | 29 | 29 | 29 | 1  | 0   | 2 | 0   | 0 | 0   |   |
| SOX10-Hs00366918_m1   | 20 | 21 | 21 | 21 | 22 | 22 | 22 | 21 | 21 | 22 | 21 | 21 | 1  | 1   | 1 | 0   | 2 | 0   |   |
| SOX9-Hs00165814_m1    | 29 | 29 | 28 | 33 | 40 | 32 | 26 | 27 | 27 | 32 | 31 | 32 | 27 | 0   | 0 | 0   | 9 | 0   |   |
| STX4-Hs00190266_m1    | 25 | 25 | 25 | 25 | 25 | 25 | 25 | 25 | 25 | 25 | 25 | 25 | 1  | 1   | 1 | 0   | 1 | 1   |   |
| STX6-Hs00195163_m1    | 23 | 24 | 24 | 23 | 23 | 22 | 23 | 23 | 23 | 23 | 23 | 23 | 1  | 0   | 1 | 0   | 1 | 0   |   |
| SYTL2-Hs00262988_m1   | 24 | 25 | 25 | 25 | 26 | 25 | 24 | 24 | 24 | 25 | 25 | 25 | 2  | 0   | 1 | 1   | 2 | 0   |   |
| TNF-Hs00174128_m1     | 36 | 35 | 35 | 40 | 40 | 40 | 40 | 40 | 40 | 34 | 35 | 40 | 0  | 0   | 0 | 0   | 1 | 1   |   |
| TYR-Hs00165976_m1     | 19 | 19 | 19 | 18 | 18 | 18 | 18 | 19 | 19 | 18 | 18 | 18 | 1  | 0   | 1 | 0   | 1 | 0   |   |
| TYRP1-Hs00167051_m1   | 16 | 16 | 16 | 16 | 16 | 16 | 16 | 16 | 16 | 15 | 15 | 15 | 1  | 0   | 1 | 0   | 1 | 0   |   |
| USF1-Hs00273038_m1    | 24 | 23 | 24 | 23 | 24 | 23 | 23 | 23 | 24 | 24 | 23 | 24 | 1  | 0   | 1 | 1   | 1 | 1   |   |
| VAMP2-Hs00360269_m1   | 24 | 22 | 24 | 24 | 23 | 24 | 24 | 24 | 23 | 23 | 23 | 24 | 1  | 0   | 1 | 0   | 1 | 1   |   |
| WNT16-Hs00365138_m1   | 34 | 33 | 32 | 40 | 40 | 40 | 40 | 40 | 40 | 40 | 33 | 40 | 0  | 0   | 0 | 0   | 3 | 0   |   |
| XPC-Hs01104206_m1     | 23 | 24 | 24 | 24 | 24 | 24 | 23 | 24 | 24 | 23 | 23 | 23 | 1  | 0   | 0 | 0   | 1 | 0   |   |
